# Supplementary material for: The Effect of Repeated Blood Harvesting from Pregnant Mares on Haematological Variables
Source: MDPI journal article supplement (doi:10.3390/ani14050745), 2024-02-28
Supplement: s1 [file s1]

## Supplementary Materials

Table S1. Descriptive statistics for the haematological variables by weeks: first week of the season, just before the first blood harvesting took place (0), one week after the 1<sup>st</sup> to the 8<sup>th</sup> blood harvesting (1-8) and 2 and 3 weeks after the last blood harvesting (+2,+3).

| Variable | Week | N   | Min  | Mean  | SD   | Max   |
|----------|------|-----|------|-------|------|-------|
| RBC      | 0    | 159 | 5.83 | 8.32  | 0.96 | 11.44 |
| RBC      | 1    | 156 | 5.11 | 7.03  | 0.83 | 9.98  |
| RBC      | 2    | 152 | 3.93 | 6.17  | 0.73 | 8.06  |
| RBC      | 3    | 146 | 4.05 | 5.86  | 0.74 | 7.92  |
| RBC      | 4    | 137 | 3.89 | 5.68  | 0.68 | 7.75  |
| RBC      | 5    | 127 | 4.38 | 5.73  | 0.71 | 7.81  |
| RBC      | 6    | 109 | 4.22 | 5.76  | 0.72 | 7.7   |
| RBC      | 7    | 92  | 4.24 | 5.77  | 0.77 | 7.93  |
| RBC      | 8    | 57  | 4.53 | 5.79  | 0.64 | 7.81  |
| RBC      | +2   | 138 | 5.01 | 6.64  | 0.8  | 8.76  |
| RBC      | +3   | 64  | 4.34 | 7.46  | 0.79 | 8.81  |
|          |      |     |      |       |      |       |
| HCT      | 0    | 159 | 26.2 | 38.64 | 4.32 | 52.5  |
| HCT      | 1    | 156 | 22.9 | 33.01 | 3.77 | 43.9  |
| HCT      | 2    | 152 | 20.9 | 30.23 | 3.52 | 40.3  |
| HCT      | 3    | 146 | 21.2 | 30.16 | 3.66 | 39.8  |
| HCT      | 4    | 137 | 19.9 | 30.45 | 3.7  | 39.4  |
| HCT      | 5    | 127 | 21.5 | 31.22 | 4.19 | 40.9  |
| HCT      | 6    | 109 | 21.4 | 31.42 | 4.33 | 41.2  |
| HCT      | 7    | 92  | 23.7 | 31.36 | 4.47 | 41.3  |
| HCT      | 8    | 57  | 25.7 | 31.25 | 3.4  | 39.8  |
| HCT      | +2   | 138 | 25.5 | 35.15 | 4.52 | 45.4  |
| HCT      | +3   | 64  | 26   | 39.6  | 4.47 | 48.3  |
|          |      |     |      |       |      |       |
| HGB      | 0    | 159 | 99   | 136   | 13   | 179   |
| HGB      | 1    | 156 | 88   | 118   | 12   | 149   |
| HGB      | 2    | 152 | 77   | 108   | 12   | 137   |
| HGB      | 3    | 146 | 81   | 107   | 12   | 136   |
| HGB      | 4    | 137 | 74   | 107   | 12   | 132   |
| HGB      | 5    | 127 | 79   | 109   | 14   | 140   |
| HGB      | 6    | 109 | 76   | 109   | 14   | 145   |
| HGB      | 7    | 92  | 82   | 109   | 15   | 142   |
| HGB      | 8    | 57  | 90   | 108   | 11   | 135   |
| HGB      | +2   | 138 | 91   | 121   | 14   | 154   |
| HGB      | +3   | 64  | 89   | 134   | 15   | 163   |
|          |      |     |      |       |      |       |
| MCV      | 0    | 159 | 37.5 | 46.6  | 3.4  | 55.2  |
| MCV      | 1    | 156 | 36.8 | 47.1  | 3.6  | 57.4  |
| MCV      | 2    | 152 | 38.2 | 49.1  | 3.9  | 60.9  |
| MCV      | 3    | 146 | 41.2 | 51.7  | 4    | 63.4  |

|      |    |     |      |      |      |       |
|------|----|-----|------|------|------|-------|
| MCV  | 4  | 137 | 41.8 | 53.8 | 4.2  | 65.8  |
| MCV  | 5  | 127 | 42.9 | 54.6 | 4.4  | 66.5  |
| MCV  | 6  | 109 | 44.2 | 54.6 | 4.5  | 66.1  |
| MCV  | 7  | 92  | 43.7 | 54.5 | 4.7  | 64.5  |
| MCV  | 8  | 57  | 43.3 | 54.2 | 4.3  | 62    |
| MCV  | +2 | 138 | 43.2 | 53   | 4.3  | 62.6  |
| MCV  | +3 | 64  | 42.2 | 53   | 3.7  | 60.8  |
|      |    |     |      |      |      |       |
| MCH  | 0  | 159 | 13.5 | 16.4 | 1.1  | 19.2  |
| MCH  | 1  | 156 | 13.6 | 16.8 | 1.2  | 19.9  |
| MCH  | 2  | 152 | 14.1 | 17.6 | 1.3  | 21.5  |
| MCH  | 3  | 146 | 14.9 | 18.3 | 1.3  | 22    |
| MCH  | 4  | 137 | 15.4 | 18.9 | 1.3  | 22.1  |
| MCH  | 5  | 127 | 15.7 | 19.1 | 1.4  | 22.5  |
| MCH  | 6  | 109 | 15.8 | 19   | 1.4  | 22.6  |
| MCH  | 7  | 92  | 15   | 19   | 1.5  | 22.4  |
| MCH  | 8  | 57  | 15.3 | 18.8 | 1.4  | 21.9  |
| MCH  | +2 | 138 | 14.7 | 18.2 | 1.4  | 21.8  |
| MCH  | +3 | 64  | 15.1 | 18   | 1.2  | 20.5  |
|      |    |     |      |      |      |       |
| MCHC | 0  | 159 | 320  | 353  | 11   | 378   |
| MCHC | 1  | 156 | 326  | 357  | 11   | 384   |
| MCHC | 2  | 152 | 331  | 358  | 9    | 379   |
| MCHC | 3  | 146 | 332  | 354  | 9    | 382   |
| MCHC | 4  | 137 | 321  | 351  | 10   | 372   |
| MCHC | 5  | 127 | 325  | 350  | 9    | 372   |
| MCHC | 6  | 109 | 325  | 349  | 9    | 371   |
| MCHC | 7  | 92  | 327  | 348  | 8    | 365   |
| MCHC | 8  | 57  | 324  | 348  | 9    | 369   |
| MCHC | +2 | 138 | 315  | 344  | 9    | 367   |
| MCHC | +3 | 64  | 308  | 339  | 10   | 357   |
|      |    |     |      |      |      |       |
| RDW  | 0  | 159 | 26.3 | 31   | 2.2  | 37.4  |
| RDW  | 1  | 156 | 25.3 | 30.6 | 2.3  | 37.2  |
| RDW  | 2  | 152 | 26.6 | 31.8 | 2.7  | 38.8  |
| RDW  | 3  | 146 | 27.4 | 32.6 | 2.5  | 39.7  |
| RDW  | 4  | 137 | 25.8 | 31.7 | 2.4  | 39.8  |
| RDW  | 5  | 127 | 25.7 | 29.7 | 2.1  | 37    |
| RDW  | 6  | 109 | 24.3 | 28   | 1.7  | 35.2  |
| RDW  | 7  | 92  | 23.5 | 27.3 | 1.7  | 33.4  |
| RDW  | 8  | 57  | 23.4 | 26.4 | 1.4  | 30.9  |
| RDW  | +2 | 138 | 22.9 | 27.8 | 1.9  | 35.5  |
| RDW  | +3 | 64  | 25.1 | 28   | 1.4  | 31.3  |
|      |    |     |      |      |      |       |
| WBC  | 0  | 159 | 5.21 | 9.5  | 1.73 | 16.22 |
| WBC  | 1  | 156 | 5.68 | 9.8  | 1.73 | 16.66 |

|      |    |     |      |      |      |       |
|------|----|-----|------|------|------|-------|
| WBC  | 2  | 152 | 5.57 | 9.63 | 1.81 | 15.35 |
| WBC  | 3  | 146 | 5.5  | 8.99 | 1.68 | 15.32 |
| WBC  | 4  | 137 | 6.16 | 8.84 | 1.53 | 13.54 |
| WBC  | 5  | 127 | 5.96 | 8.61 | 1.48 | 15.2  |
| WBC  | 6  | 108 | 5.08 | 8.63 | 1.46 | 13.48 |
| WBC  | 7  | 92  | 5.78 | 8.57 | 1.36 | 13.69 |
| WBC  | 8  | 57  | 5.96 | 8.54 | 1.54 | 13    |
| WBC  | +2 | 138 | 6.2  | 8.51 | 1.36 | 12.2  |
| WBC  | +3 | 64  | 5.77 | 8.73 | 1.38 | 11.93 |
|      |    |     |      |      |      |       |
| NEU  | 0  | 159 | 1.8  | 4.47 | 0.87 | 7.27  |
| NEU  | 1  | 156 | 2.65 | 4.78 | 0.96 | 8.58  |
| NEU  | 2  | 152 | 2.34 | 4.74 | 1.09 | 10.53 |
| NEU  | 3  | 146 | 2.65 | 4.47 | 0.94 | 8.04  |
| NEU  | 4  | 137 | 2.08 | 4.48 | 0.88 | 6.94  |
| NEU  | 5  | 127 | 2.63 | 4.42 | 0.89 | 9.46  |
| NEU  | 6  | 108 | 2.47 | 4.47 | 0.77 | 6.76  |
| NEU  | 7  | 92  | 3.07 | 4.6  | 0.76 | 7.53  |
| NEU  | 8  | 57  | 3.45 | 4.7  | 0.89 | 7.26  |
| NEU  | +2 | 138 | 2.53 | 4.46 | 0.78 | 7.28  |
| NEU  | +3 | 64  | 2.82 | 4.7  | 0.79 | 6.46  |
|      |    |     |      |      |      |       |
| LYM  | 0  | 159 | 1.48 | 3.53 | 1.02 | 7.79  |
| LYM  | 1  | 156 | 1.58 | 3.49 | 1    | 7.52  |
| LYM  | 2  | 152 | 1.69 | 3.38 | 0.89 | 6.62  |
| LYM  | 3  | 146 | 1.26 | 3.17 | 0.89 | 7.28  |
| LYM  | 4  | 137 | 1.28 | 3.12 | 0.88 | 6.7   |
| LYM  | 5  | 127 | 1.31 | 3.06 | 0.94 | 7.17  |
| LYM  | 6  | 108 | 1.35 | 3    | 0.88 | 6.98  |
| LYM  | 7  | 92  | 1.01 | 2.84 | 0.91 | 7.4   |
| LYM  | 8  | 57  | 1.46 | 2.71 | 0.82 | 6.22  |
| LYM  | +2 | 138 | 1.39 | 2.91 | 0.86 | 5.91  |
| LYM  | +3 | 64  | 1.06 | 2.88 | 0.91 | 5.61  |
|      |    |     |      |      |      |       |
| MONO | 0  | 159 | 0.27 | 0.57 | 0.13 | 1.11  |
| MONO | 1  | 156 | 0.32 | 0.61 | 0.14 | 1     |
| MONO | 2  | 152 | 0.29 | 0.6  | 0.15 | 1.29  |
| MONO | 3  | 146 | 0.29 | 0.54 | 0.14 | 1.08  |
| MONO | 4  | 137 | 0.2  | 0.55 | 0.14 | 1.08  |
| MONO | 5  | 127 | 0.33 | 0.53 | 0.12 | 0.97  |
| MONO | 6  | 108 | 0.29 | 0.52 | 0.13 | 0.93  |
| MONO | 7  | 92  | 0.31 | 0.52 | 0.13 | 0.98  |
| MONO | 8  | 57  | 0.25 | 0.51 | 0.14 | 1.16  |
| MONO | +2 | 138 | 0.25 | 0.47 | 0.13 | 0.92  |
| MONO | +3 | 64  | 0.33 | 0.52 | 0.1  | 0.81  |

|      |    |     |      |      |      |      |
|------|----|-----|------|------|------|------|
| EOS  | 0  | 159 | 0.18 | 0.85 | 0.46 | 3.13 |
| EOS  | 1  | 156 | 0.23 | 0.82 | 0.4  | 2.28 |
| EOS  | 2  | 152 | 0.13 | 0.84 | 0.49 | 2.44 |
| EOS  | 3  | 146 | 0.12 | 0.73 | 0.45 | 2.35 |
| EOS  | 4  | 137 | 0.14 | 0.62 | 0.38 | 2.55 |
| EOS  | 5  | 127 | 0.17 | 0.54 | 0.28 | 1.81 |
| EOS  | 6  | 108 | 0.15 | 0.56 | 0.28 | 1.71 |
| EOS  | 7  | 92  | 0.07 | 0.54 | 0.27 | 1.52 |
| EOS  | 8  | 57  | 0.24 | 0.57 | 0.26 | 1.5  |
| EOS  | +2 | 138 | 0.16 | 0.58 | 0.29 | 1.86 |
| EOS  | +3 | 64  | 0.22 | 0.57 | 0.26 | 1.37 |
|      |    |     |      |      |      |      |
| BASO | 0  | 159 | 0.01 | 0.07 | 0.07 | 0.71 |
| BASO | 1  | 156 | 0.01 | 0.09 | 0.07 | 0.5  |
| BASO | 2  | 152 | 0    | 0.07 | 0.05 | 0.29 |
| BASO | 3  | 146 | 0    | 0.07 | 0.06 | 0.32 |
| BASO | 4  | 137 | 0.01 | 0.07 | 0.06 | 0.31 |
| BASO | 5  | 127 | 0.01 | 0.06 | 0.05 | 0.21 |
| BASO | 6  | 108 | 0.01 | 0.07 | 0.05 | 0.32 |
| BASO | 7  | 92  | 0.01 | 0.08 | 0.04 | 0.2  |
| BASO | 8  | 57  | 0.01 | 0.06 | 0.04 | 0.15 |
| BASO | +2 | 138 | 0    | 0.08 | 0.05 | 0.37 |
| BASO | +3 | 64  | 0.02 | 0.07 | 0.03 | 0.17 |

---
